# Supplementary material
Source: MDPI journal article supplement (https://www.mdpi.com/2073-4395/13/10/2662)
Supplement: s1 [file s1]

Table S1. Rice varieties and their sources.

| serial | variety    | province     | serial | variety      | province | serial | variety      | province     | serial | variety     | province     |
|--------|------------|--------------|--------|--------------|----------|--------|--------------|--------------|--------|-------------|--------------|
| 1      | Dannuo3    | Liaoning     | 21     | Tiejing14    | Liaoning | 41     | Yunongjing12 | Henan        | 61     | Longjing31  | Heilongjiang |
| 2      | Danzaodao4 | Liaoning     | 22     | Tiejing15    | Liaoning | 42     | Yunongjing16 | Henan        | 62     | Longjing39  | Heilongjiang |
| 3      | Danjing17  | Liaoning     | 23     | Tiejing16    | Liaoning | 43     | Zhengdao19   | Henan        | 63     | Longjing46  | Heilongjiang |
| 4      | Danjing18  | Liaoning     | 24     | Tiejing17    | Liaoning | 44     | Zhengdao20   | Henan        | 64     | Longjing47  | Heilongjiang |
| 5      | Danjing20  | Liaoning     | 25     | Tiejing20    | Liaoning | 45     | Zhengdao201  | Henan        | 65     | Longjing50  | Heilongjiang |
| 6      | Dan219     | Liaoning     | 26     | Tiejing1507  | Liaoning | 46     | Xinnongjing1 | Xinjiang     | 66     | Longjing51  | Heilongjiang |
| 7      | Dan1634    | Liaoning     | 27     | Tiejing1601  | Liaoning | 47     | Xinnongjing3 | Xinjiang     | 67     | Longjing61  | Heilongjiang |
| 8      | Suijing15  | Heilongjiang | 28     | Tiejing1602  | Liaoning | 48     | Xindao3      | Xinjiang     | 68     | 99A         | Liaoning     |
| 9      | Suijing18  | Heilongjiang | 29     | Tiejing1603  | Liaoning | 49     | Xindao11     | Xinjiang     | 69     | 52A         | Liaoning     |
| 10     | Suijing21  | Heilongjiang | 30     | Tiejing1605  | Liaoning | 50     | Jingjing2    | Beijing      | 70     | C2106       | Liaoning     |
| 11     | Suijing28  | Heilongjiang | 31     | Tiejing18    | Liaoning | 51     | Jingjing3    | Beijing      | 71     | Shengdao18  | Shandong     |
| 12     | Kenjing12  | Heilongjiang | 32     | Jijing88     | Jilin    | 52     | Zhongzuo1701 | Beijing      | 72     | Shengdao19  | Shandong     |
| 13     | Kenjing27  | Heilongjiang | 33     | Jijing511    | Jilin    | 53     | Zhongzuo1703 | Beijing      | 73     | Shengdao22  | Shandong     |
| 14     | Kenjing31  | Heilongjiang | 34     | Jijing515    | Jilin    | 54     | Zhongzuo1704 | Beijing      | 74     | Shengdao072 | Shandong     |
| 15     | Kenjing32  | Heilongjiang | 35     | Jijing528    | Jilin    | 55     | Fuyuan4      | Ningxia      | 75     | Liaoxing1   | Liaoning     |
| 16     | Kenjing33  | Heilongjiang | 36     | Jijing809    | Jilin    | 56     | 2009G-19     | Ningxia      | 76     | Liaonong979 | Liaoning     |
| 17     | Kenjing34  | Heilongjiang | 37     | Tonghe99     | Jilin    | 57     | Ningjing43   | Ningxia      | 77     | Liaokai79   | Liaoning     |
| 18     | Kenjing42  | Heilongjiang | 38     | Tongyu269    | Jilin    | 58     | Ningjing48   | Ningxia      | 78     | Liaoxing21  | Liaoning     |
| 19     | Tiejing7   | Liaoning     | 39     | Tongyu256    | Jilin    | 59     | Kenjing8     | Heilongjiang | 79     | Liaojing212 | Liaoning     |
| 20     | Tiejing11  | Liaoning     | 40     | Yunongjing11 | Henan    | 60     | Longjing20   | Heilongjiang | 80     | Liaojing401 | Liaoning     |

Table S2. Molecular markers of rice blast resistance genes.

| Gene/Locus                        | Primer name      | Primer sequence         | Expected Size (bp)                                         |
|-----------------------------------|------------------|-------------------------|------------------------------------------------------------|
| <i>Pib</i>                        | <i>Pib</i> -F    | TAACTCCAAAGGAGCTCAGG    | 915                                                        |
|                                   | <i>Pib</i> -R    | CGTGATGCGTGGACTTTCGC    |                                                            |
| <i>Pikh/Pik-ku/Pikm/Piks/Pikp</i> | RGA4-F           | GGAAAGCTGATATGTTGTCTG   | 1326                                                       |
|                                   | RGA4-R           | ACTCGGAGTCGGAGAGTCAG    |                                                            |
| <i>Pi5</i>                        | <i>Pi5</i> -F    | CCAAGTGCAACTAGAGGTATGGT | 1105                                                       |
|                                   | <i>Pi5</i> -R    | GTGCATCATCTTCAGATATCAGG |                                                            |
| <i>Pita</i>                       | YL155            | AGCAGGTTATAAGCTAGGCC    | 1000                                                       |
|                                   | YL87             | CTACCAACAAGTTCATCAAA    |                                                            |
| <i>Pita</i>                       | YL183            | AGCAGGTTATAAGCTAGCTAT   | 1000                                                       |
|                                   | YL87             | CTACCAACAAGTTCATCAAA    |                                                            |
| <i>Ptr</i>                        | Z12-F            | TGCAGATTTGACTGCTCGGT    | 226(S)/214(R)                                              |
|                                   | Z12-R            | GGGATCTTCCTCGCCCAA      |                                                            |
| <i>Pi2/Pi9/Piz-t</i>              | <i>Pi9</i> Pro-F | TGATTATGTTTTTTATGTGGGG  | 111 for <i>Pi2/Piz-t</i> allele, 128 for <i>Pi9</i> allele |
|                                   | <i>Pi9</i> Pro-R | ATTAGTGAGATCCATTGTTCC   | 138 for non- <i>Pi2/Piz-t</i> , non- <i>Pi9</i> alleles    |
| <i>Pi2/Pi9/Piz-t</i>              | <i>Pi2</i> GF    | GCAGGAATCTCAGATGGTGG    | 322 for <i>Pi2</i>                                         |
|                                   | <i>Pi2</i> GR    | TCTCTCTTAGCTGATCCAAGTCA |                                                            |

Note: R indicates resistance and S indicates susceptible.
